## CASE REPORT

# A case of effective Delorme's procedure for colonic mucosal prolapse after intersphincteric resection

Akihiro Kohata<sup>1</sup>, Wataru Shimizu<sup>2,\*</sup>, Masatoshi Kochi<sup>1</sup>, Yuji Takakura<sup>2</sup> and Hideki Ohdan<sup>3</sup>

<sup>1</sup>Department of Surgery, National Hospital Organization Higashi Hiroshima Medical Center, Higashihiroshima, Japan, <sup>2</sup>Department of Gastroenterological and Transplant Surgery, Graduate School of Biomedical and Health Sciences, Hiroshima University Hospital, Hiroshima, Japan and <sup>3</sup>Gastroenterological and Transplant Surgery, Applied Life Sciences, Institute of Biomedical & Health Sciences, Hiroshima University Hospital, Hiroshima, Japan

\*Correspondence address. 1-2-3, Kasumi, Minami-ku, Hiroshima-shi, Hiroshima-ken 734-8551, Japan. E-mail: shimizuw@hiroshima-u.ac.jp

## Abstract

Recent surgical technical improvements, such as endoscopic surgery with intersphincteric resection (ISR), could help avoid a permanent colostomy for patients with low-lying rectal tumors. However, the problems associated with anal dysfunction following ISR remain unresolved. We performed ISR and temporary ileostomy in a patient with low-lying rectal cancer. After evaluating the stability of the anastomosis, we planned to close the ileostomy, but the patient developed post-operative colonic mucosal prolapse (CMP). Although there are treatment methods available for CMP, there is no consensus on the treatment for post-operative CMP. In this case, we performed Delorme's procedure because the method has been reported to have advantages in terms of improving post-operative anal function. Post-operative anorectal manometry showed improvement in maximum squeeze pressure, and the patient's anal function improved; subsequently, ileostomy closure was performed. Delorme's procedure may be useful for patients with CMP after ISR to achieve good post-operative anal function.

## INTRODUCTION

Since abdominoperineal resection (APR) was reported in the 1920s, this surgical method has been a standard treatment for low rectal cancer [1]; however, over the last two decades, surgical treatments have dramatically improved, and now, patients have options other than a permanent colostomy [2]. Recently, intersphincteric resection (ISR) is performed for very low-lying rectal cancers. This procedure requires a temporary colostomy or ileostomy because of the risk of an anastomotic leak but preserves the anus compared to a permanent stoma. However, it may decrease anal function.

Colonic mucosal prolapse (CMP) is a benign anal disease that adversely affects the anus by causing symptoms such as pain and discomfort, bleeding during defecation and worsened anal function.

There are various surgical procedures for CMP. Delorme's procedure is a minimally invasive procedure that maintains anal function.

Here, we report a case of Delorme's procedure for CMP that developed after ISR. The post-operative anal function was preserved to some extent.

Received: June 21, 2021. Accepted: July 27, 2021

Published by Oxford University Press and JSCR Publishing Ltd. All rights reserved. © The Author(s) 2021.

This is an Open Access article distributed under the terms of the Creative Commons Attribution Non-Commercial License (<http://creativecommons.org/licenses/by-nc/4.0/>), which permits non-commercial re-use, distribution, and reproduction in any medium, provided the original work is properly cited. For commercial re-use, please contact [journals.permissions@oup.com](mailto:journals.permissions@oup.com)

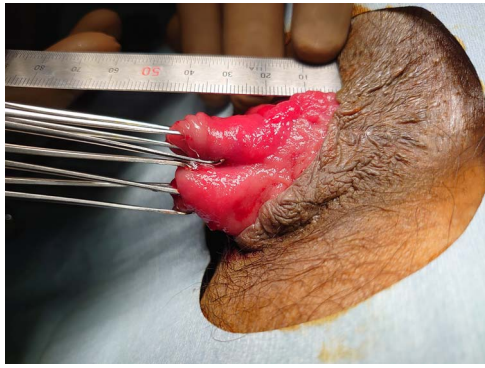

Figure 1: Side view of CMP after ISR

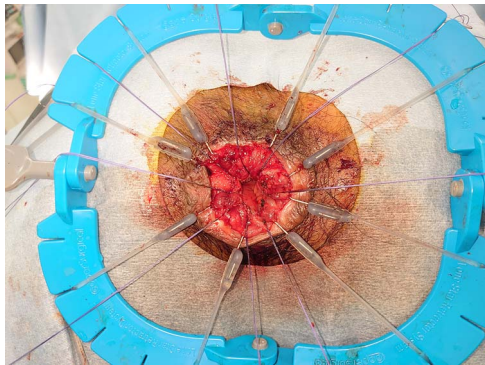

Figure 2: anus at the end of the Delorme's procedure

## CASE REPORT

The patient was a 61-year-old man who presented to the clinic with a chief complaint of positive fecal occult blood. Total colonoscopy revealed an erythematous, elevated 25-mm Type 0-Is tumor in the lower rectum, and the tumor was detected as a hypoechoic mass on endoscopic ultrasound. Computed tomography showed no distant metastases or lymph nodes around the tumor. Endoscopic submucosal dissection was performed. Pathology revealed that the tumor depth was pT1b (submucosa, 5000  $\mu$ m, Ly0, V0, BD2), and additional surgical resection was required; thus, robot-assisted total-ISR with temporary ileostomy was performed. The patient recovered and did not have any post-operative complications and was discharged on post-operative Day 11.

When the patient visited the outpatient clinic after discharge, he was diagnosed with CMP due to prolapse of the bowel anastomosis from the anus (Fig. 1).

It was determined that the patient had anal dysfunction, thus, surgery for CMP was performed prior to the ileostomy closure.

Considering its less invasive nature, we selected Delorme's procedure (Fig. 2). The patient's post-operative course was good, and he was discharged 4 days after surgery.

Anal function was assessed prior to surgery and post-operatively. Although the maximum resting pressure (MRP) remained low (13.2–18.0 mmHg), the maximum squeeze pressure (MSP) score changed from 214 mmHg preoperatively to 350 mmHg post-operatively. Subsequent anorectal function was good, and ileostomy closure surgery was performed.

## DISCUSSION

ISR is a surgical procedure for sphincter-saving rectal surgeries in patients with very low rectal cancer and is an alternative to APR to avoid permanent colostomy. ISR has produced acceptable oncological results for early-stage cancer with similar recurrence and survival rates to APR [3]. Although ISR preserves the anus, there may be deterioration of quality of life due to fecal incontinence caused by anal dysfunction [2].

ISR is classified into three types according to the height of the circular incision in the anal canal: circular incision of the anal canal is started at the dentate line in partial-ISR, between the dentate line and intersphincteric groove in subtotal ISR and at the intersphincteric groove in total ISR [4].

As total ISR involves complete internal anal sphincter (IAS) removal, anal dysfunction is a serious potential complication as the MRP is mainly affected by the IAS [4].

There are several subtypes of rectal prolapse. Complete full-thickness rectal prolapse involves the protrusion of the full thickness of the rectal wall through the anus. The pathogenesis of rectal prolapse remains controversial. Full-thickness prolapse can be recognized as a sliding hernia through a pelvic fascial defect, or an internal rectal intussusception that progresses to a full-thickness prolapse with straining. CMP is often recognized in prolapsing colostomies or prolapsing hemorrhoids at the rectum, or an anastomotic complication occurring in 5–10% of patients, following total ISR [5]. It may be attributed to stretching and weakness of the connective tissue in the colonic mucosa [6]. Additionally, CMP after ISR may be associated with reduced anal sphincter function due to resection of the IAS.

There are two approaches to surgical treatment for rectal prolapse: transabdominal and perineal. Although the abdominal approach is thought to have significantly lower recurrence rates, randomized trials have not found evidence supporting superiority of the abdominal—over the perineal approach [6].

There are studies in which the median reduction of the improvement using the Wexner continence score following perineal resection, including Delorme's procedure, exceeded that following laparoscopic ventral mesh rectopexy or posterior sutured rectopexy [6]. These functional improvements are thought to be due to the recovery of anal sphincter tone after removal of the prolapsed rectum, which was stretching and attenuating its muscle fibers [6]. In addition, Delorme's procedure may result in an internal sphincter-like function by adding sutures to the intestinal muscle layer after mucosal resection [5]. This may have improved the Wexner score even in post-ISR cases.

There are treatments for rectal prolapse, but there is no certainty about the treatment of CMP after ISR. Narihiro et al. reported that among 720 cases of ISR, 33 (4.5%) were diagnosed with post-operative mucosal prolapse in the anastomosis after the long-term follow-ups. Furthermore, they stated that once prolapse occurred around the anus, patients complained of severe local symptoms, requiring surgical interventions, which undermined their quality of life [5]. Delorme's procedure was performed for all patients with post-operative CMP, and symptoms improved in all of them. No patients complained of anal discomfort due to incontinence or prolapse, except for pain in four patients [5].

Post-operative Delorme's surgery for CMP increases the MRP and MSP and decreases the minimum expression of feces and the maximum tolerated dose. The addition of sutures to the muscle layer brings about a sphincter-like function and may be responsible for the increase in MRP or MSP.

Although there is literature suggesting good anal function with Delorme's surgery after ISR, there are no reports describing anorectal manometry. In our case, we confirmed the MSP improvement, and this led us to perform ileostomy closure.

This case suggests that Delorme's surgery is a potential treatment option for CMP after low rectal surgery like ISR.

### ACKNOWLEDGEMENTS

We would like to thank Editage ([www.editage.jp](http://www.editage.jp)) for English language editing.

### CONFLICT OF INTEREST STATEMENT

None declared.

### REFERENCES

1. Ito M, Saito N, Sugito M, Kobayashi A, Nishizawa Y, Tsunoda Y. Analysis of clinical factors associated with anal function after intersphincteric resection for very low rectal cancer. *Dis Colon Rectum* 2009;**52**:64–70.
2. Tokoro T, Okuno K, Hida J, Ueda K, Yoshifuji T, Daito K, et al. Analysis of the clinical factors associated with anal function after intersphincteric resection for very low rectal cancer. *World J Surg Oncol* 2013;**11**:24.
3. Park IJ, Kim JC. Intersphincteric resection for patients with low-lying rectal cancer: oncological and functional outcomes. *Ann Coloproctol* 2018;**34**:167–74.
4. Shirouzu K, Murakami N, Akagi Y. Intersphincteric resection for very low rectal cancer: a review of the updated literature. *Ann Gastroenterol Surg* 2017;**1**:24–32.
5. Narihiro S, Miura N, Nishizawa Y, Hasegawa H, Ikeda K, Teramura K, et al. Delorme surgery for colonic mucosal prolapse after intersphincteric resection. *Surg Today* 2021;**51**: 916–22.
6. Emile SH, Elfeki H, Shalaby M, Sakr A, Sileri P, Wexner SD. Perineal resectional procedures for the treatment of complete rectal prolapse: a systematic review of the literature. *Int J Surg* 2017;**46**:146–54.
